# Supplementary material
Source: PubMed Central journal article supplement (PMC7477010)
Supplement: mmc1.pdf [file mmc1.pdf]

**The American Journal of Human Genetics, Volume 107**

**Supplemental Data**

**The Role of Host Genetic Factors in Coronavirus  
Susceptibility: Review of Animal and Systematic  
Review of Human Literature**

**Marissa LoPresti, David B. Beck, Priya Duggal, Derek A.T. Cummings, and Benjamin D. Solomon**

## Supplemental Materials

### Methods of Article Ascertainment and Categorization

We conducted an initial search of the PubMed database (last queried June 18, 2020) using each of the following phrases: “host genetics”; “genetic resistance”; “genetic susceptibility”; “genetic factors”; “genetics”; “GWAS” along with each of the following terms: “coronavirus”; “SARS”; “MERS”; “COVID-19”; “COVID19”. We also identified additional articles by searching for specific coronaviruses or coronavirus-associated conditions (e.g., “canine coronavirus”; “middle east respiratory syndrome”) along with the term “genetics”. Articles were included in the search regardless of publication date. Articles included electronic, ahead-of-print publications available in the PubMed database. We also identified and categorized relevant articles from the references of initially selected articles. We did not include articles only available on non-peer reviewed preprint servers, though recognize that a substantial number of these manuscripts will be on PubMed soon.

Each abstract was reviewed by a single reviewer. Full articles were reviewed when insufficient data were available in the abstract, or when no abstract was available. Publications were classified into the following categories: 1) Study of human host genetic factors related to coronavirus; 2) Study of non-human (animal) host genetic factors related to coronavirus; 3) Study of non-genetic (including non-DNA-based analyses - see further explanation below) host factors related to coronavirus, including involving immunopathogenesis; 4) Study of other pathogens (not coronavirus); 5) Other studies of coronavirus. Articles containing information in both categories 1 and 2 were identified as such; articles were otherwise categorized according to the lowest numerical category (e.g., an article involving both human host genetic factors to coronavirus as well as immunopathogenesis would be categorized into group 1. Articles that did not involve investigations of specific DNA-based genetic changes (e.g., transcriptomic or proteomic studies) were categorized into group 3, as were studies that only included

analyses of sex without other genetic analyses. Other publications, including: 6) Untranslated studies in another language (not English); 7) Not relevant (unrelated to coronavirus or other pathogens); 8) No data available; were removed from further analysis after categorization into these latter three categories.

Data from category 1 publications were manually extracted for relevant information pertaining to: coronavirus studied; general methods and questions analyzed; gene(s), variant(s), or loci analyzed; size of cohorts studied; geographic or ancestral composition of cohorts; statistical results, including the principal summary measures (where available) of odds ratios, confidence intervals, and p-values.

**Table S1.** List of all articles identified and categorizations.

**Table S2.** Details of association studies pertaining to specific genes/variants. In the “Key genes or alleles studied” column, significant genes with specific alleles are noted; for non-significant alleles, the gene is given. rs IDs (dbSNP) or other identifiers are given when available. In addition to the PMIDs listed in Table S2 (12969506<sup>1</sup>; 15243926<sup>2</sup>; 15331509<sup>3</sup>; 15381116<sup>4</sup>; 15766558<sup>5</sup>; 15819995<sup>6</sup>; 15838797<sup>7</sup>; 15937940<sup>8</sup>; 16170752<sup>9</sup>; 16185324<sup>10</sup>; 16652313<sup>11</sup>; 16824203<sup>12</sup>; 16369534<sup>13</sup>; 16455884<sup>14</sup>; 17534354<sup>15</sup>; 17534355<sup>16</sup>; 17540042<sup>17</sup>; 17570115<sup>18</sup>; 17913858<sup>19</sup>; 18312678<sup>20</sup>; 18478121<sup>21</sup>; 18697825<sup>22</sup>; 18708672<sup>23</sup>; 19405982<sup>24</sup>; 19445991<sup>25</sup>; 19590927<sup>26</sup>; 20359516<sup>27</sup>; 20462354<sup>28</sup>; 20864745<sup>29</sup>; 20864747<sup>30</sup>; 21904596<sup>31</sup>; 21958371<sup>32</sup>; 24643938<sup>33</sup>; 25818534<sup>34</sup>; 26524966<sup>35</sup>; 32348495<sup>36</sup>), several other non-quantitative studies are described in Table 1.<sup>37-39</sup>

**Table S3.** Examples of COVID-19 related guidance for specific genetic conditions or situations.

Additional work has been published on the aspects of the practice of genetics during the COVID-19 pandemic.<sup>40; 41</sup>

| Condition           | PMID                   |
|---------------------|------------------------|
| Charcot-Marie-Tooth | 32317558 <sup>42</sup> |

|                                              |                        |
|----------------------------------------------|------------------------|
| Gaucher                                      | 32471800 <sup>43</sup> |
| Glucose-6-phosphate dehydrogenase deficiency | 32380930 <sup>44</sup> |
| Inborn errors of metabolism                  | 32409735 <sup>45</sup> |
| Inherited arrhythmias                        | 32244059 <sup>46</sup> |

**Supplemental References for PMIDs in Table 2** (18495771<sup>47</sup>; 146 99140<sup>48</sup>; 25653449<sup>49</sup>; 8799201<sup>50</sup>; 10023135<sup>51</sup>; 14599795<sup>52</sup>; 30301856<sup>53</sup>; 24604562<sup>54</sup>; 18158733<sup>55</sup>; 15518805<sup>56</sup>; 11543653<sup>57</sup>; 22615569<sup>58</sup>; 11483763<sup>59</sup>; 15331748<sup>60</sup>; 17142734<sup>61</sup>; 17617609<sup>62</sup>; 18973912<sup>63</sup>; 24574399<sup>64</sup>; 25653445<sup>65</sup>; 29691378<sup>66</sup>; 30142928<sup>67</sup>; 31883094<sup>68</sup>; 23102608<sup>69</sup>; 15070459<sup>70</sup>; 26423942<sup>71</sup>; 18667505<sup>72</sup>; 19215224<sup>73</sup>; 19650917<sup>74</sup>; 20386712<sup>75</sup>; 9973424<sup>76</sup>; 11864749<sup>77</sup>; 8752933<sup>78</sup>; 15039522<sup>79</sup>; 20042510<sup>80</sup>; 15027615<sup>81</sup>; 26367131<sup>82</sup>; 29717007<sup>83</sup>; 19079579<sup>84</sup>; 25428866<sup>85</sup>; 23919993<sup>86</sup>; 15919828<sup>87</sup>; 23142821<sup>88</sup>; 23015710<sup>89</sup>; 28592648<sup>90</sup>; 19740307<sup>91</sup>; 26015500<sup>92</sup>; 26452100<sup>93</sup>; 24648452<sup>94</sup>)

### Supplemental References

1. Lin, M., Tseng, H.K., Trejaut, J.A., Lee, H.L., Loo, J.H., Chu, C.C., Chen, P.J., Su, Y.W., Lim, K.H., Tsai, Z.U., et al. (2003). Association of HLA class I with severe acute respiratory syndrome coronavirus infection. *BMC Med Genet* 4, 9.
2. Ng, M.H., Lau, K.M., Li, L., Cheng, S.H., Chan, W.Y., Hui, P.K., Zee, B., Leung, C.B., and Sung, J.J. (2004). Association of human-leukocyte-antigen class I (B\*0703) and class II (DRB1\*0301) genotypes with susceptibility and resistance to the development of severe acute respiratory syndrome. *J Infect Dis* 190, 515-518.

3. Chiu, R.W., Tang, N.L., Hui, D.S., Chung, G.T., Chim, S.S., Chan, K.C., Sung, Y.M., Chan, L.Y., Tong, Y.K., Lee, W.S., et al. (2004). ACE2 gene polymorphisms do not affect outcome of severe acute respiratory syndrome. *Clin Chem* 50, 1683-1686.
4. Itoyama, S., Keicho, N., Quy, T., Phi, N.C., Long, H.T., Ha, L.D., Ban, V.V., Ohashi, J., Hijikata, M., Matsushita, I., et al. (2004). ACE1 polymorphism and progression of SARS. *Biochem Biophys Res Commun* 323, 1124-1129.
5. Hamano, E., Hijikata, M., Itoyama, S., Quy, T., Phi, N.C., Long, H.T., Ha, L.D., Ban, V.V., Matsushita, I., Yanai, H., et al. (2005). Polymorphisms of interferon-inducible genes OAS-1 and MxA associated with SARS in the Vietnamese population. *Biochem Biophys Res Commun* 329, 1234-1239.
6. Chan, K.C., Tang, N.L., Hui, D.S., Chung, G.T., Wu, A.K., Chim, S.S., Chiu, R.W., Lee, N., Choi, K.W., Sung, Y.M., et al. (2005). Absence of association between angiotensin converting enzyme polymorphism and development of adult respiratory distress syndrome in patients with severe acute respiratory syndrome: a case control study. *BMC Infect Dis* 5, 26.
7. Ip, W.K., Chan, K.H., Law, H.K., Tso, G.H., Kong, E.K., Wong, W.H., To, Y.F., Yung, R.W., Chow, E.Y., Au, K.L., et al. (2005). Mannose-binding lectin in severe acute respiratory syndrome coronavirus infection. *J Infect Dis* 191, 1697-1704.
8. Itoyama, S., Keicho, N., Hijikata, M., Quy, T., Phi, N.C., Long, H.T., Ha, L.D., Ban, V.V., Matsushita, I., Yanai, H., et al. (2005). Identification of an alternative 5'-untranslated exon and new polymorphisms of angiotensin-converting enzyme 2 gene: lack of association with SARS in the Vietnamese population. *Am J Med Genet A* 136, 52-57.
9. Zhang, H., Zhou, G., Zhi, L., Yang, H., Zhai, Y., Dong, X., Zhang, X., Gao, X., Zhu, Y., and He, F. (2005). Association between mannose-binding lectin gene polymorphisms and susceptibility to severe acute respiratory syndrome coronavirus infection. *J Infect Dis* 192, 1355-1361.

10. Yuan, F.F., Tanner, J., Chan, P.K., Biffin, S., Dyer, W.B., Geczy, A.F., Tang, J.W., Hui, D.S., Sung, J.J., and Sullivan, J.S. (2005). Influence of FcγRIIA and MBL polymorphisms on severe acute respiratory syndrome. *Tissue Antigens* 66, 291-296.
11. Chen, W.J., Yang, J.Y., Lin, J.H., Fann, C.S., Osyetrov, V., King, C.C., Chen, Y.M., Chang, H.L., Kuo, H.W., Liao, F., et al. (2006). Nasopharyngeal shedding of severe acute respiratory syndrome-associated coronavirus is associated with genetic polymorphisms. *Clin Infect Dis* 42, 1561-1569.
12. He, J., Feng, D., de Vlas, S.J., Wang, H., Fontanet, A., Zhang, P., Plancoulaine, S., Tang, F., Zhan, L., Yang, H., et al. (2006). Association of SARS susceptibility with single nucleic acid polymorphisms of OAS1 and MxA genes: a case-control study. *BMC Infect Dis* 6, 106.
13. Chan, V.S., Chan, K.Y., Chen, Y., Poon, L.L., Cheung, A.N., Zheng, B., Chan, K.H., Mak, W., Ngan, H.Y., Xu, X., et al. (2006). Homozygous L-SIGN (CLEC4M) plays a protective role in SARS coronavirus infection. *Nat Genet* 38, 38-46.
14. Chen, Y.M., Liang, S.Y., Shih, Y.P., Chen, C.Y., Lee, Y.M., Chang, L., Jung, S.Y., Ho, M.S., Liang, K.Y., Chen, H.Y., et al. (2006). Epidemiological and genetic correlates of severe acute respiratory syndrome coronavirus infection in the hospital with the highest nosocomial infection rate in Taiwan in 2003. *J Clin Microbiol* 44, 359-365.
15. Tang, N.L., Chan, P.K., Hui, D.S., To, K.F., Zhang, W., Chan, F.K., Sung, J.J., and Lo, Y.M. (2007). Lack of support for an association between CLEC4M homozygosity and protection against SARS coronavirus infection. *Nat Genet* 39, 691-692; author reply 694-696.
16. Zhi, L., Zhou, G., Zhang, H., Zhai, Y., Yang, H., Zhang, F., Wang, S., Wei, M., Cao, W., and He, F. (2007). Lack of support for an association between CLEC4M homozygosity and protection against SARS coronavirus infection. *Nat Genet* 39, 692-694; author reply 694-696.

17. Ng, M.W., Zhou, G., Chong, W.P., Lee, L.W., Law, H.K., Zhang, H., Wong, W.H., Fok, S.F., Zhai, Y., Yung, R.W., et al. (2007). The association of RANTES polymorphism with severe acute respiratory syndrome in Hong Kong and Beijing Chinese. *BMC Infect Dis* 7, 50.
18. Chan, K.Y., Ching, J.C., Xu, M.S., Cheung, A.N., Yip, S.P., Yam, L.Y., Lai, S.T., Chu, C.M., Wong, A.T., Song, Y.Q., et al. (2007). Association of ICAM3 genetic variant with severe acute respiratory syndrome. *J Infect Dis* 196, 271-280.
19. Yuan, F.F., Boehm, I., Chan, P.K., Marks, K., Tang, J.W., Hui, D.S., Sung, J.J., Dyer, W.B., Geczy, A.F., and Sullivan, J.S. (2007). High prevalence of the CD14-159CC genotype in patients infected with severe acute respiratory syndrome-associated coronavirus. *Clin Vaccine Immunol* 14, 1644-1645.
20. Wang, S., Wei, M., Han, Y., Zhang, K., He, L., Yang, Z., Su, B., Zhang, Z., Hu, Y., and Hui, W. (2008). Roles of TNF-alpha gene polymorphisms in the occurrence and progress of SARS-Cov infection: a case-control study. *BMC Infect Dis* 8, 27.
21. Tang, F., Liu, W., Zhang, F., Xin, Z.T., Wei, M.T., Zhang, P.H., Yang, H., Ly, H., and Cao, W.C. (2008). IL-12 RB1 genetic variants contribute to human susceptibility to severe acute respiratory syndrome infection among Chinese. *PLoS One* 3, e2183.
22. Li, H., Tang, N.L., Chan, P.K., Wang, C.Y., Hui, D.S., Luk, C., Kwok, R., Huang, W., Sung, J.J., Kong, Q.P., et al. (2008). Polymorphisms in the C-type lectin genes cluster in chromosome 19 and predisposition to severe acute respiratory syndrome coronavirus (SARS-CoV) infection. *J Med Genet* 45, 752-758.
23. Khoo, U.S., Chan, K.Y., Chan, V.S., Ching, J.C., Yam, L., Chu, C.M., Lai, S.T., Wong, T.Y., Tam, P., Yip, S.P., et al. (2008). Role of polymorphisms of the inflammatory response genes and DC-SIGNR in genetic susceptibility to SARS and other infections. *Hong Kong Med J* 14 Suppl 4, 31-35.

24. Wang, Y., Yan, J., Shi, Y., Li, P., Liu, C., Ma, Q., Yang, R., Wang, X., Zhu, L., Yang, X., et al. (2009). Lack of association between polymorphisms of MASP2 and susceptibility to SARS coronavirus infection. *BMC Infect Dis* 9, 51.
25. Keicho, N., Itoyama, S., Kashiwase, K., Phi, N.C., Long, H.T., Ha, L.D., Ban, V.V., Hoa, B.K., Hang, N.T., Hijikata, M., et al. (2009). Association of human leukocyte antigen class II alleles with severe acute respiratory syndrome in the Vietnamese population. *Hum Immunol* 70, 527-531.
26. Hsieh, Y.H., Chen, C.W., Schmitz, S.F., King, C.C., Chen, W.J., Wu, Y.C., and Ho, M.S. (2010). Candidate genes associated with susceptibility for SARS-coronavirus. *Bull Math Biol* 72, 122-132.
27. Chan, K.Y., Xu, M.S., Ching, J.C., So, T.M., Lai, S.T., Chu, C.M., Yam, L.Y., Wong, A.T., Chung, P.H., Chan, V.S., et al. (2010). CD209 (DC-SIGN) -336A>G promoter polymorphism and severe acute respiratory syndrome in Hong Kong Chinese. *Hum Immunol* 71, 702-707.
28. Ching, J.C., Chan, K.Y., Lee, E.H., Xu, M.S., Ting, C.K., So, T.M., Sham, P.C., Leung, G.M., Peiris, J.S., and Khoo, U.S. (2010). Significance of the myxovirus resistance A (MxA) gene -123C>a single-nucleotide polymorphism in suppressed interferon beta induction of severe acute respiratory syndrome coronavirus infection. *J Infect Dis* 201, 1899-1908.
29. Ng, M.H., Cheng, S.H., Lau, K.M., Leung, G.M., Khoo, U.S., Zee, B.C., and Sung, J.J. (2010). Immunogenetics in SARS: a case-control study. *Hong Kong Med J* 16, 29-33.
30. Chan, K.Y., Xu, M.S., Ching, J.C., Chan, V.S., Ip, Y.C., Yam, L., Chu, C.M., Lai, S.T., So, K.M., Wong, T.Y., et al. (2010). Association of a single nucleotide polymorphism in the CD209 (DC-SIGN) promoter with SARS severity. *Hong Kong Med J* 16, 37-42.
31. Zhu, X., Wang, Y., Zhang, H., Liu, X., Chen, T., Yang, R., Shi, Y., Cao, W., Li, P., Ma, Q., et al. (2011). Genetic variation of the human alpha-2-Heremans-Schmid glycoprotein (AHSG) gene associated with the risk of SARS-CoV infection. *PLoS One* 6, e23730.



32. Wang, S.F., Chen, K.H., Chen, M., Li, W.Y., Chen, Y.J., Tsao, C.H., Yen, M.Y., Huang, J.C., and Chen, Y.M. (2011). Human-leukocyte antigen class I Cw 1502 and class II DR 0301 genotypes are associated with resistance to severe acute respiratory syndrome (SARS) infection. *Viral Immunol* 24, 421-426.
33. Yuan, F.F., Velickovic, Z., Ashton, L.J., Dyer, W.B., Geczy, A.F., Dunckley, H., Lynch, G.W., and Sullivan, J.S. (2014). Influence of HLA gene polymorphisms on susceptibility and outcome post infection with the SARS-CoV virus. *Virol Sin* 29, 128-130.
34. Tu, X., Chong, W.P., Zhai, Y., Zhang, H., Zhang, F., Wang, S., Liu, W., Wei, M., Siu, N.H., Yang, H., et al. (2015). Functional polymorphisms of the CCL2 and MBL genes cumulatively increase susceptibility to severe acute respiratory syndrome coronavirus infection. *J Infect* 71, 101-109.
35. Patarcic, I., Gelemanovic, A., Kirin, M., Kolcic, I., Theodoratou, E., Baillie, K.J., de Jong, M.D., Rudan, I., Campbell, H., and Polasek, O. (2015). The role of host genetic factors in respiratory tract infectious diseases: systematic review, meta-analyses and field synopsis. *Sci Rep* 5, 16119.
36. Zhang, Y., Qin, L., Zhao, Y., Zhang, P., Xu, B., Li, K., Liang, L., Zhang, C., Dai, Y., Feng, Y., et al. (2020). Interferon-Induced Transmembrane Protein 3 Genetic Variant rs12252-C Associated With Disease Severity in Coronavirus Disease 2019. *J Infect Dis* 222, 34-37.
37. Yousefzadegan, S., and Rezaei, N. (2020). Case Report: Death due to COVID-19 in Three Brothers. *Am J Trop Med Hyg* 102, 1203-1204.
38. Soresina, A., Moratto, D., Chiarini, M., Paolillo, C., Baresi, G., Foca, E., Bezzi, M., Baronio, B., Giacomelli, M., and Badolato, R. (2020). Two X-linked agammaglobulinemia patients develop pneumonia as COVID-19 manifestation but recover. *Pediatr Allergy Immunol*.
39. Ikitimur, H., Borku Uysal, B., Cengiz, M., Ikitimur, B., Uysal, H., Ozcan, E., Islamoglu, M.S., Seyhan, S., Yavuzer, H., and Yavuzer, S. (2020). "Determining Host Factors Contributing to Disease Severity

in a Family Cluster of 29 Hospitalized SARS-CoV-2 Patients: Could Genetic Factors Be Relevant in the Clinical Course of COVID-19?". *J Med Virol*.

40. Regier, D.S., Smith, W.E., and Byers, H.M. (2020). Medical genetics education in the midst of the COVID-19 pandemic: Shared resources. *Am J Med Genet A* 182, 1302-1308.
41. Pereira, E.M., Columbia University Clinical Genetics, P., and Chung, W.K. (2020). COVID-19's Impact on Genetics at One Medical Center in New York. *Genet Med*.
42. Prada, V., Bellone, E., Schenone, A., and Grandis, M. (2020). The suspected SARS-Cov-2 infection in a Charcot-Marie-Tooth patient undergoing postsurgical rehabilitation: the value of telerehabilitation for evaluation and continuing treatment. *Int J Rehabil Res*.
43. Mistry, P., Balwani, M., Barbouth, D., Burrow, T.A., Ginns, E.I., Goker-Alpan, O., Grabowski, G.A., Kartha, R.V., Kishnani, P.S., Lau, H., et al. (2020). Gaucher disease and SARS-CoV-2 infection: Emerging management challenges. *Mol Genet Metab* 130, 164-169.
44. Khneisser, I., and Farra, C. (2020). Chloroquine and the potential adverse outcome in undiagnosed G6PD-deficient cases infected with COVID-19. *J Med Screen*, 969141320924452.
45. Brunetti-Pierri, N., Fecarotta, S., Staiano, A., Strisciuglio, P., and Parenti, G. (2020). Ensuring continuity of care for children with inherited metabolic diseases at the time of COVID-19: the experience of a metabolic unit in Italy. *Genet Med*.
46. Wu, C.I., Postema, P.G., Arbelo, E., Behr, E.R., Bezzina, C.R., Napolitano, C., Robyns, T., Probst, V., Schulze-Bahr, E., Remme, C.A., et al. (2020). SARS-CoV-2, COVID-19, and inherited arrhythmia syndromes. *Heart Rhythm*.
47. Netland, J., Meyerholz, D.K., Moore, S., Cassell, M., and Perlman, S. (2008). Severe acute respiratory syndrome coronavirus infection causes neuronal death in the absence of encephalitis in mice transgenic for human ACE2. *J Virol* 82, 7264-7275.

48. Prentice, E., Jerome, W.G., Yoshimori, T., Mizushima, N., and Denison, M.R. (2004). Coronavirus replication complex formation utilizes components of cellular autophagy. *J Biol Chem* 279, 10136-10141.
49. Burkard, C., Verheije, M.H., Haagmans, B.L., van Kuppeveld, F.J., Rottier, P.J., Bosch, B.J., and de Haan, C.A. (2015). ATP1A1-mediated Src signaling inhibits coronavirus entry into host cells. *J Virol* 89, 4434-4448.
50. Houtman, J.J., and Fleming, J.O. (1996). Dissociation of demyelination and viral clearance in congenitally immunodeficient mice infected with murine coronavirus JHM. *J Neurovirol* 2, 101-110.
51. Lavi, E., Das Sarma, J., and Weiss, S.R. (1999). Cellular reservoirs for coronavirus infection of the brain in beta2-microglobulin knockout mice. *Pathobiology* 67, 75-83.
52. Cai, Y., Liu, Y., Yu, D., and Zhang, X. (2003). Down-regulation of transcription of the proapoptotic gene BNip3 in cultured astrocytes by murine coronavirus infection. *Virology* 316, 104-115.
53. Gralinski, L.E., Sheahan, T.P., Morrison, T.E., Menachery, V.D., Jensen, K., Leist, S.R., Whitmore, A., Heise, M.T., and Baric, R.S. (2018). Complement Activation Contributes to Severe Acute Respiratory Syndrome Coronavirus Pathogenesis. *mBio* 9.
54. Xu, G.L., Chen, J., Yang, F., Li, G.Q., Zheng, L.X., and Wu, Y.Z. (2014). C5a/C5aR pathway is essential for the pathogenesis of murine viral fulminant hepatitis by way of potentiating Fgl2/fibroleukin expression. *Hepatology* 60, 114-124.
55. Hickey, M.J., Held, K.S., Baum, E., Gao, J.L., Murphy, P.M., and Lane, T.E. (2007). CCR1 deficiency increases susceptibility to fatal coronavirus infection of the central nervous system. *Viral Immunol* 20, 599-608.
56. Held, K.S., Chen, B.P., Kuziel, W.A., Rollins, B.J., and Lane, T.E. (2004). Differential roles of CCL2 and CCR2 in host defense to coronavirus infection. *Virology* 329, 251-260.

57. Glass, W.G., Liu, M.T., Kuziel, W.A., and Lane, T.E. (2001). Reduced macrophage infiltration and demyelination in mice lacking the chemokine receptor CCR5 following infection with a neurotropic coronavirus. *Virology* 288, 8-17.
58. Karnam, G., Rygiel, T.P., Raaben, M., Grinwis, G.C., Coenjaerts, F.E., Rensing, M.E., Rottier, P.J., de Haan, C.A., and Meyaard, L. (2012). CD200 receptor controls sex-specific TLR7 responses to viral infection. *PLoS Pathog* 8, e1002710.
59. Blau, D.M., Turbide, C., Tremblay, M., Olson, M., Letourneau, S., Michaliszyn, E., Jothy, S., Holmes, K.V., and Beauchemin, N. (2001). Targeted disruption of the Ceacam1 (MHVR) gene leads to reduced susceptibility of mice to mouse hepatitis virus infection. *J Virol* 75, 8173-8186.
60. Hemmila, E., Turbide, C., Olson, M., Jothy, S., Holmes, K.V., and Beauchemin, N. (2004). Ceacam1a<sup>-/-</sup> mice are completely resistant to infection by murine coronavirus mouse hepatitis virus A59. *J Virol* 78, 10156-10165.
61. Stiles, L.N., Hardison, J.L., Schaumburg, C.S., Whitman, L.M., and Lane, T.E. (2006). T cell antiviral effector function is not dependent on CXCL10 following murine coronavirus infection. *J Immunol* 177, 8372-8380.
62. Walsh, K.B., Edwards, R.A., Romero, K.M., Kotlajich, M.V., Stohlman, S.A., and Lane, T.E. (2007). Expression of CXC chemokine ligand 10 from the mouse hepatitis virus genome results in protection from viral-induced neurological and liver disease. *J Immunol* 179, 1155-1165.
63. Muse, M., Kane, J.A., Carr, D.J., Farber, J.M., and Lane, T.E. (2008). Insertion of the CXC chemokine ligand 9 (CXCL9) into the mouse hepatitis virus genome results in protection from viral-induced encephalitis and hepatitis. *Virology* 382, 132-144.
64. Cockrell, A.S., Peck, K.M., Yount, B.L., Agnihothram, S.S., Scobey, T., Curnes, N.R., Baric, R.S., and Heise, M.T. (2014). Mouse dipeptidyl peptidase 4 is not a functional receptor for Middle East respiratory syndrome coronavirus infection. *J Virol* 88, 5195-5199.

65. Peck, K.M., Cockrell, A.S., Yount, B.L., Scobey, T., Baric, R.S., and Heise, M.T. (2015). Glycosylation of mouse DPP4 plays a role in inhibiting Middle East respiratory syndrome coronavirus infection. *J Virol* 89, 4696-4699.
66. Jiang, Y., Zhao, G., Song, N., Li, P., Chen, Y., Guo, Y., Li, J., Du, L., Jiang, S., Guo, R., et al. (2018). Blockade of the C5a-C5aR axis alleviates lung damage in hDPP4-transgenic mice infected with MERS-CoV. *Emerg Microbes Infect* 7, 77.
67. Fan, C., Wu, X., Liu, Q., Li, Q., Liu, S., Lu, J., Yang, Y., Cao, Y., Huang, W., Liang, C., et al. (2018). A Human DPP4-Knockin Mouse's Susceptibility to Infection by Authentic and Pseudotyped MERS-CoV. *Viruses* 10.
68. Leist, S.R., and Cockrell, A.S. (2020). Genetically Engineering a Susceptible Mouse Model for MERS-CoV-Induced Acute Respiratory Distress Syndrome. *Methods Mol Biol* 2099, 137-159.
69. Tirotta, E., Duncker, P., Oak, J., Klaus, S., Tsukamoto, M.R., Gov, L., and Lane, T.E. (2013). Epstein-Barr virus-induced gene 3 negatively regulates neuroinflammation and T cell activation following coronavirus-induced encephalomyelitis. *J Neuroimmunol* 254, 110-116.
70. Scavizzi, F., and Raspa, M. (2004). Tissue distribution and duration of mouse hepatitis virus in naturally infected immunocompetent ICR (CD-1) and immunodeficient athymic nude-nu mouse strains used for ovarian transplantation and in vitro fertilization. *Lab Anim* 38, 189-199.
71. Zalinger, Z.B., Elliott, R., Rose, K.M., and Weiss, S.R. (2015). MDA5 Is Critical to Host Defense during Infection with Murine Coronavirus. *J Virol* 89, 12330-12340.
72. Roth-Cross, J.K., Bender, S.J., and Weiss, S.R. (2008). Murine coronavirus mouse hepatitis virus is recognized by MDA5 and induces type I interferon in brain macrophages/microglia. *J Virol* 82, 9829-9838.

73. Raaben, M., Prins, H.J., Martens, A.C., Rottier, P.J., and De Haan, C.A. (2009). Non-invasive imaging of mouse hepatitis coronavirus infection reveals determinants of viral replication and spread in vivo. *Cell Microbiol* 11, 825-841.
74. Raaben, M., Groot Koerkamp, M.J., Rottier, P.J., and de Haan, C.A. (2009). Type I interferon receptor-independent and -dependent host transcriptional responses to mouse hepatitis coronavirus infection in vivo. *BMC Genomics* 10, 350.
75. Frieman, M.B., Chen, J., Morrison, T.E., Whitmore, A., Funkhouser, W., Ward, J.M., Lamirande, E.W., Roberts, A., Heise, M., Subbarao, K., et al. (2010). SARS-CoV pathogenesis is regulated by a STAT1 dependent but a type I, II and III interferon receptor independent mechanism. *PLoS Pathog* 6, e1000849.
76. Parra, B., Hinton, D.R., Marten, N.W., Bergmann, C.C., Lin, M.T., Yang, C.S., and Stohlman, S.A. (1999). IFN-gamma is required for viral clearance from central nervous system oligodendroglia. *J Immunol* 162, 1641-1647.
77. Kyuwa, S., Shibata, S., Tagawa, Y., Iwakura, Y., Machii, K., and Urano, T. (2002). Acute hepatic failure in IFN-gamma-deficient BALB/c mice after murine coronavirus infection. *Virus Res* 83, 169-177.
78. Schijns, V.E., Wierda, C.M., van Hoeij, M., and Horzinek, M.C. (1996). Exacerbated viral hepatitis in IFN-gamma receptor-deficient mice is not suppressed by IL-12. *J Immunol* 157, 815-821.
79. de Wit, M.C., Horzinek, M.C., Haagmans, B.L., and Schijns, V. (2004). Host-dependent type 1 cytokine responses driven by inactivated viruses may fail to default in the absence of IL-12 or IFN-alpha/beta. *J Gen Virol* 85, 795-803.
80. Parra, G.I., Bergmann, C.C., Phares, T.W., Hinton, D.R., Atkinson, R., and Stohlman, S.A. (2010). Gamma interferon signaling in oligodendrocytes is critical for protection from neurotropic coronavirus infection. *J Virol* 84, 3111-3115.

81. Compton, S.R., Ball-Goodrich, L.J., Paturzo, F.X., and Macy, J.D. (2004). Transmission of enterotropic mouse hepatitis virus from immunocompetent and immunodeficient mice. *Comp Med* 54, 29-35.
82. Guo, S., Yang, C., Diao, B., Huang, X., Jin, M., Chen, L., Yan, W., Ning, Q., Zheng, L., Wu, Y., et al. (2015). The NLRP3 Inflammasome and IL-1beta Accelerate Immunologically Mediated Pathology in Experimental Viral Fulminant Hepatitis. *PLoS Pathog* 11, e1005155.
83. Athmer, J., Fehr, A.R., Grunewald, M.E., Qu, W., Wheeler, D.L., Graepel, K.W., Channappanavar, R., Sekine, A., Aldabeeb, D.S., Gale, M., Jr., et al. (2018). Selective Packaging in Murine Coronavirus Promotes Virulence by Limiting Type I Interferon Responses. *mBio* 9.
84. Sheahan, T., Morrison, T.E., Funkhouser, W., Uematsu, S., Akira, S., Baric, R.S., and Heise, M.T. (2008). MyD88 is required for protection from lethal infection with a mouse-adapted SARS-CoV. *PLoS Pathog* 4, e1000240.
85. Fehr, A.R., Athmer, J., Channappanavar, R., Phillips, J.M., Meyerholz, D.K., and Perlman, S. (2015). The nsp3 macrodomain promotes virulence in mice with coronavirus-induced encephalitis. *J Virol* 89, 1523-1536.
86. Gralinski, L.E., Bankhead, A., 3rd, Jeng, S., Menachery, V.D., Prohl, S., Belisle, S.E., Matzke, M., Webb-Robertson, B.J., Luna, M.L., Shukla, A.K., et al. (2013). Mechanisms of severe acute respiratory syndrome coronavirus-induced acute lung injury. *mBio* 4.
87. Lassnig, C., Sanchez, C.M., Egerbacher, M., Walter, I., Majer, S., Kolbe, T., Pallares, P., Enjuanes, L., and Muller, M. (2005). Development of a transgenic mouse model susceptible to human coronavirus 229E. *Proc Natl Acad Sci U S A* 102, 8275-8280.
88. Graham, R.L., Becker, M.M., Eckerle, L.D., Bolles, M., Denison, M.R., and Baric, R.S. (2012). A live, impaired-fidelity coronavirus vaccine protects in an aged, immunocompromised mouse model of lethal disease. *Nat Med* 18, 1820-1826.

89. Page, C., Goicochea, L., Matthews, K., Zhang, Y., Klover, P., Holtzman, M.J., Hennighausen, L., and Frieman, M. (2012). Induction of alternatively activated macrophages enhances pathogenesis during severe acute respiratory syndrome coronavirus infection. *J Virol* 86, 13334-13349.
90. Gralinski, L.E., Menachery, V.D., Morgan, A.P., Totura, A.L., Beall, A., Kocher, J., Plante, J., Harrison-Shostak, D.C., Schafer, A., Pardo-Manuel de Villena, F., et al. (2017). Allelic Variation in the Toll-Like Receptor Adaptor Protein Ticam2 Contributes to SARS-Coronavirus Pathogenesis in Mice. *G3 (Bethesda)* 7, 1653-1663.
91. Jacques, A., Bleau, C., Turbide, C., Beauchemin, N., and Lamontagne, L. (2009). Macrophage interleukin-6 and tumour necrosis factor- $\alpha$  are induced by coronavirus fixation to Toll-like receptor 2/heparan sulphate receptors but not carcinoembryonic cell adhesion antigen 1a. *Immunology* 128, e181-192.
92. Totura, A.L., Whitmore, A., Agnihothram, S., Schafer, A., Katze, M.G., Heise, M.T., and Baric, R.S. (2015). Toll-Like Receptor 3 Signaling via TRIF Contributes to a Protective Innate Immune Response to Severe Acute Respiratory Syndrome Coronavirus Infection. *mBio* 6, e00638-00615.
93. Gralinski, L.E., Ferris, M.T., Aylor, D.L., Whitmore, A.C., Green, R., Frieman, M.B., Deming, D., Menachery, V.D., Miller, D.R., Buus, R.J., et al. (2015). Genome Wide Identification of SARS-CoV Susceptibility Loci Using the Collaborative Cross. *PLoS Genet* 11, e1005504.
94. Ma, X.Z., Bartczak, A., Zhang, J., He, W., Shalev, I., Smil, D., Chen, L., Phillips, J., Feld, J.J., Selzner, N., et al. (2014). Protein interferon-stimulated gene 15 conjugation delays but does not overcome coronavirus proliferation in a model of fulminant hepatitis. *J Virol* 88, 6195-6204.
